# Supplementary figures and images for: Canine Mammary Tumor Cell Lines Derived from Metastatic Foci Show Increased RAD51 Expression but Diminished Radioresistance via p21 Inhibition
Source: MDPI journal article supplement (doi:10.3390/vetsci9120703), 2022-12-17

Figure 1

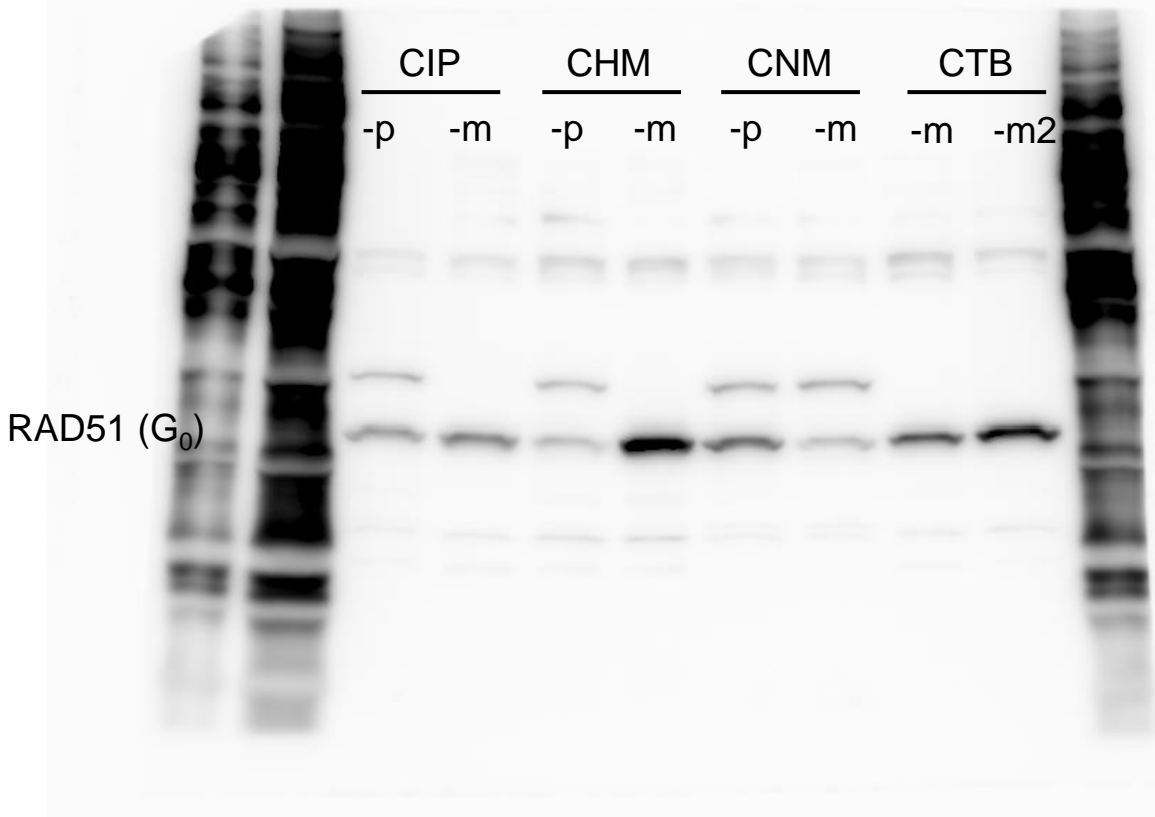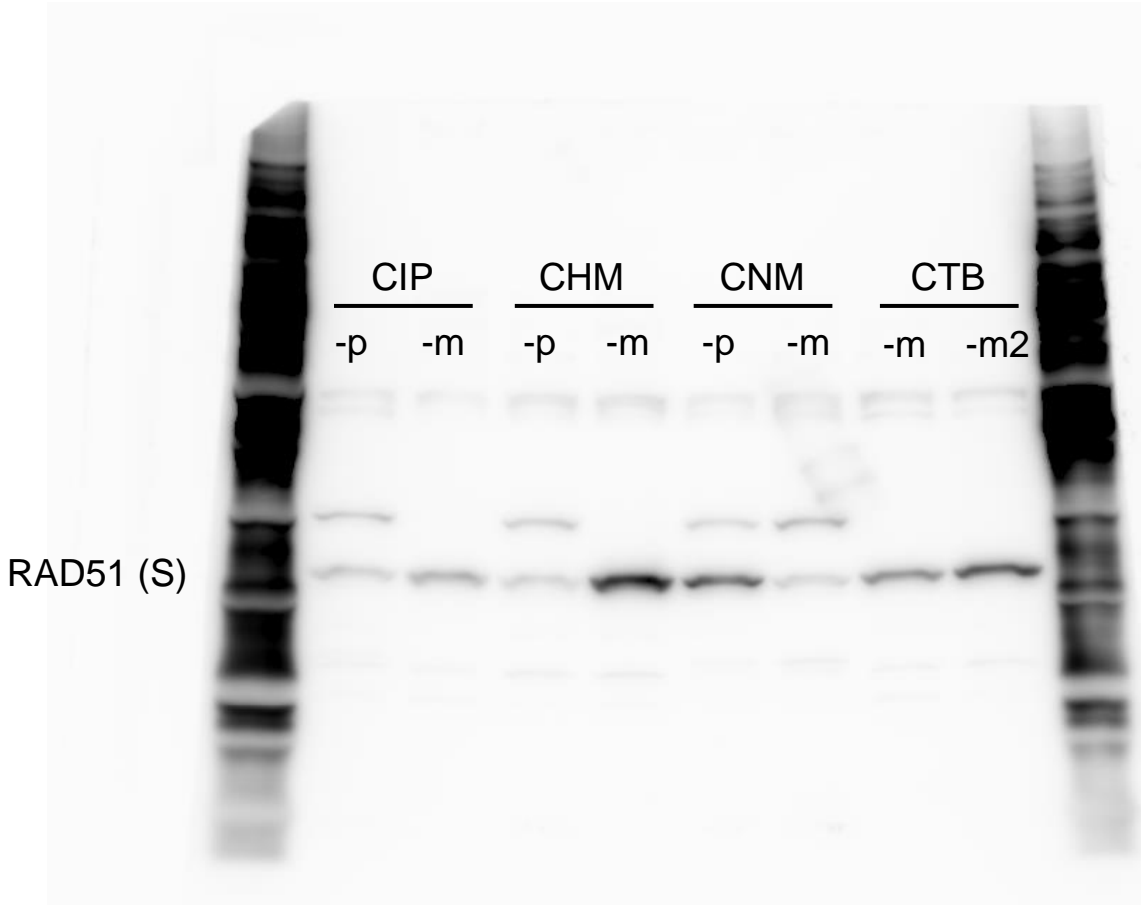

Figure 1

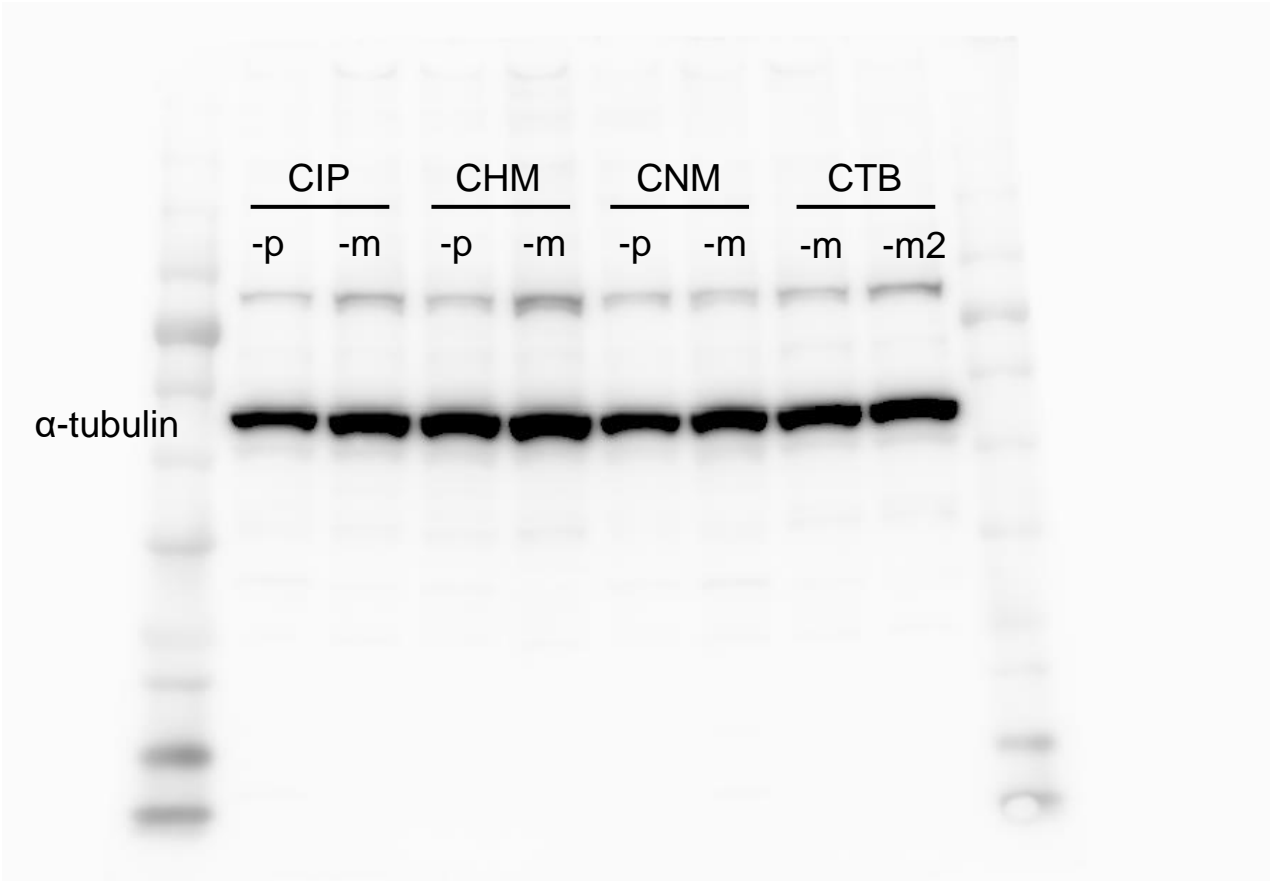

Figure 6

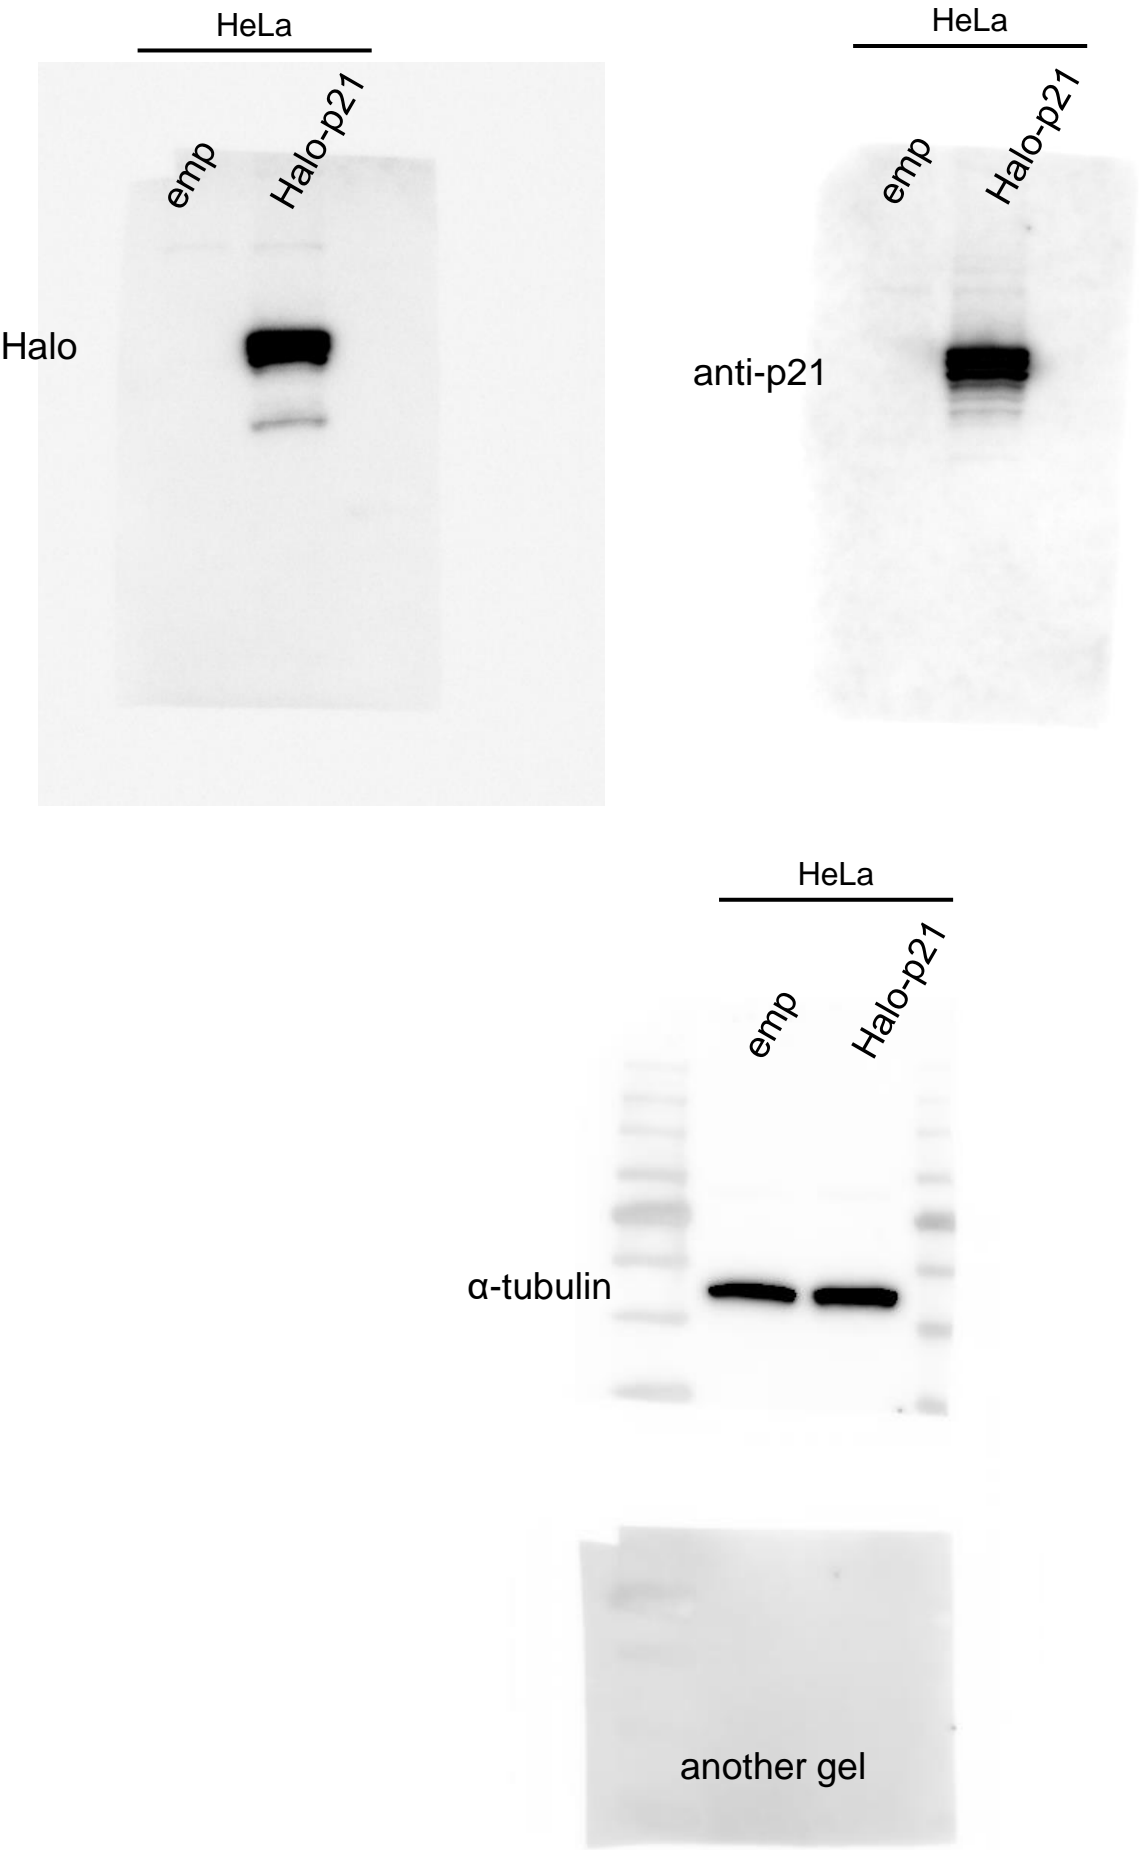

Figure 7A

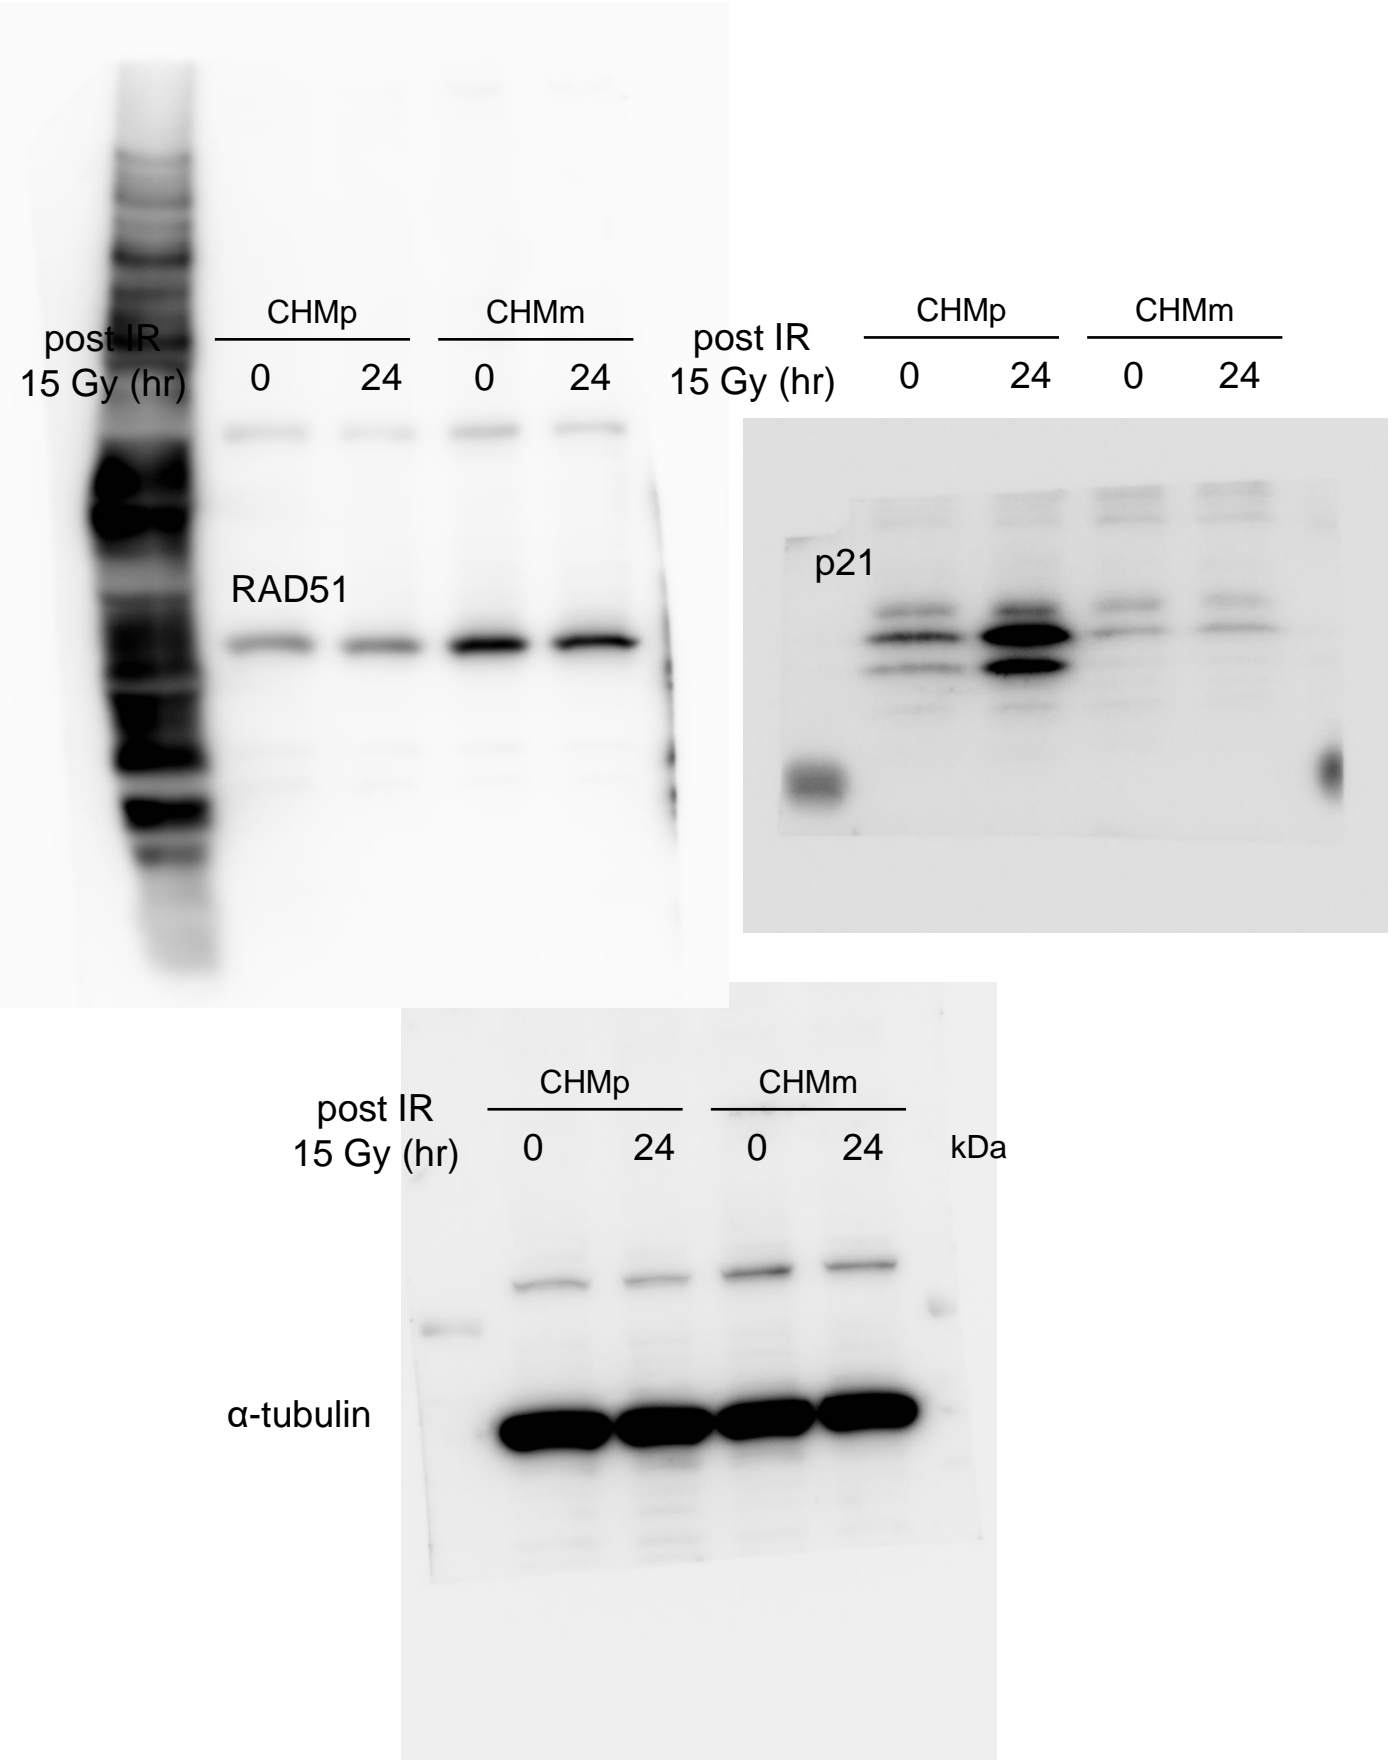

Figure 7B

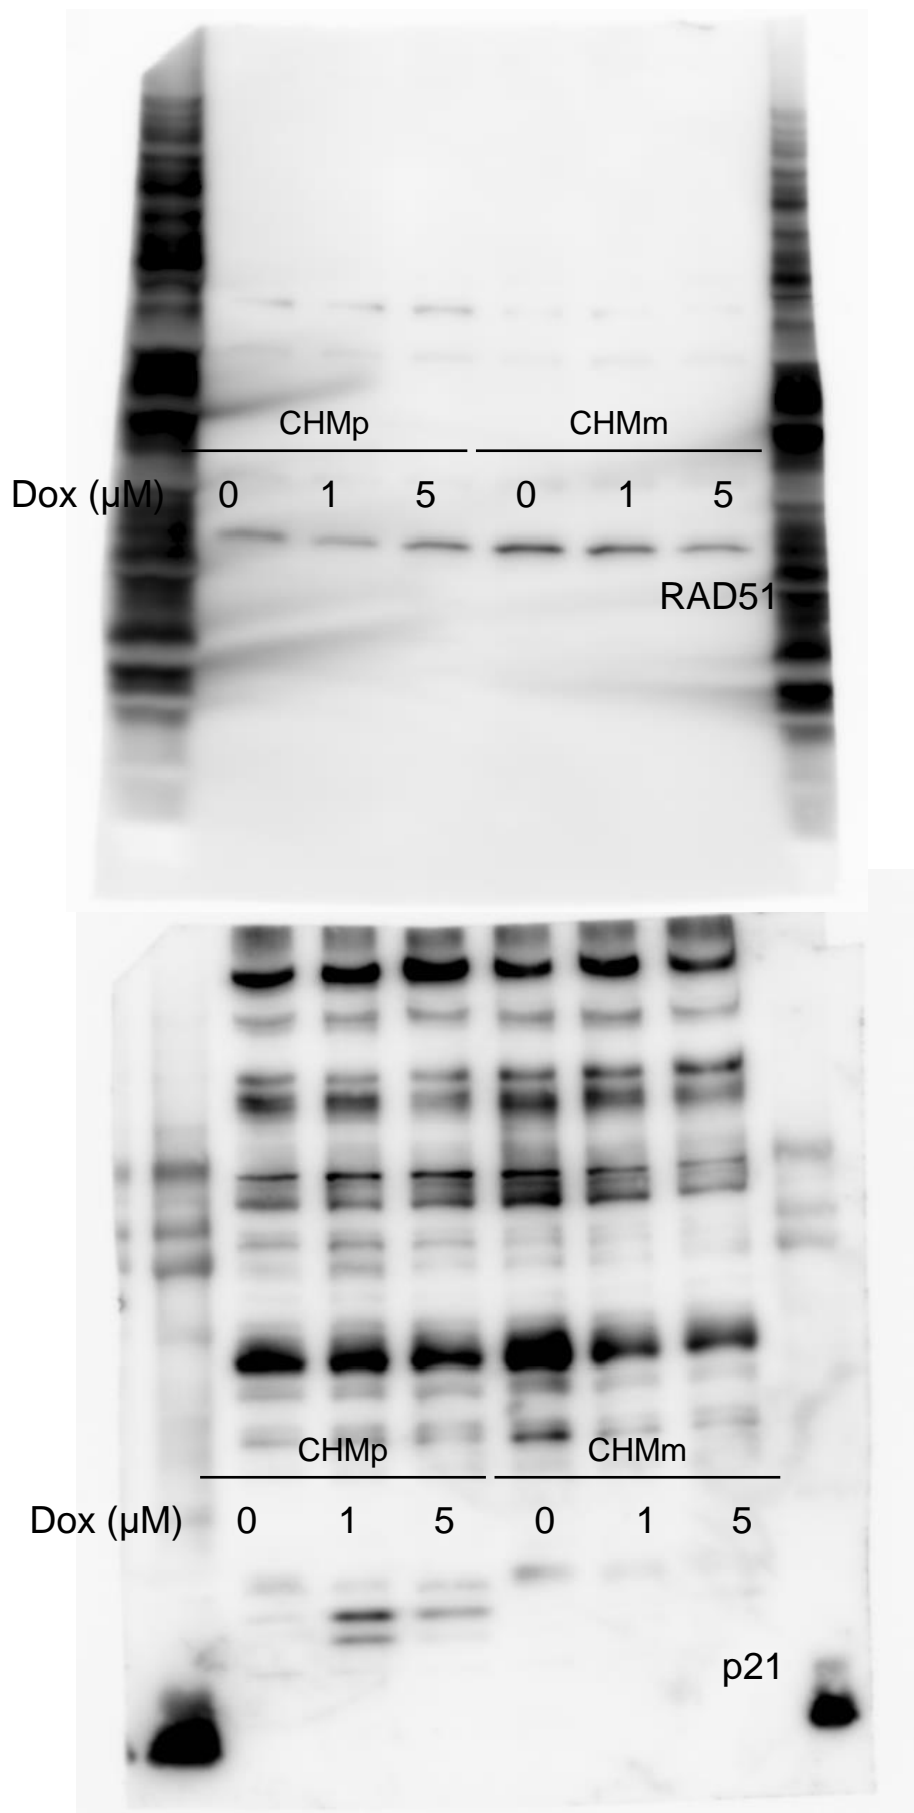

Figure 7B

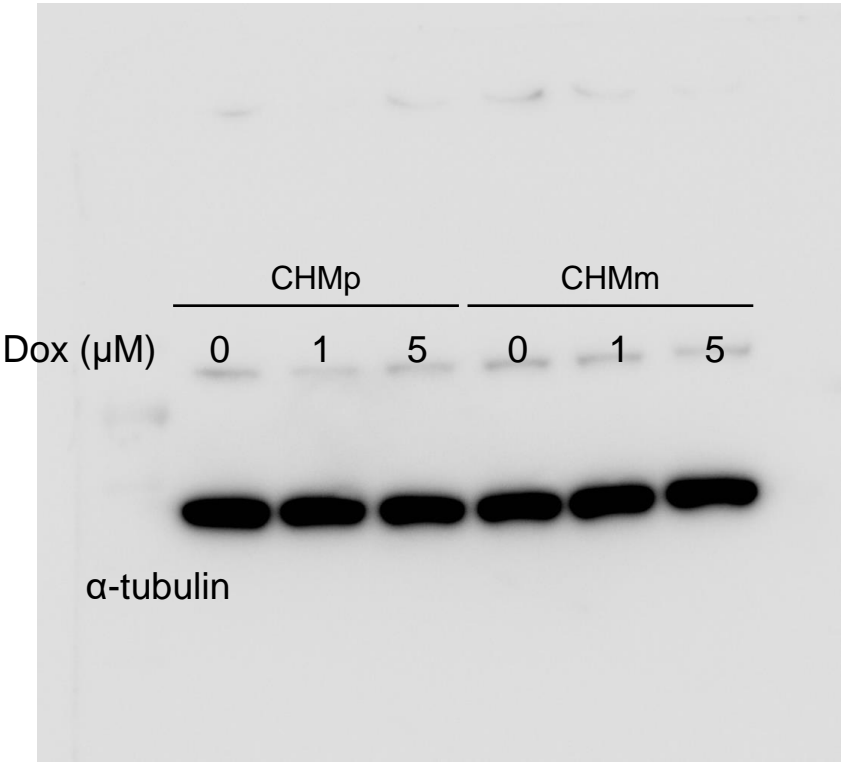

Supplement: s1 [file s1]
